# Supplementary material for: Chemical Compositions and Antioxidant Activities of Indonesian Citrus Essential Oils and Their Elucidation Using Principal Component Analysis
Source: Preprints.org preprint supplement (doi:10.20944/preprints202011.0586.v1), 2020-11-23
Supplement: Supplementary file 1 [file supplementary]

Supporting Information

# Chemical Compositions and Antioxidant Activities of Indonesian Citrus Essential Oils and Their Elucidation Using Principal Component Analysis

Euis Juliaeha <sup>1</sup>, Kristin Shinta Dewi <sup>1</sup>, Mohamad Nurzaman <sup>2</sup>, Tati Herlina <sup>1</sup>, Tatang Wahyudi <sup>3</sup>, Ari Hardianto <sup>1\*</sup>

<sup>1</sup> Department of Chemistry, Faculty of Mathematics and Natural Sciences, Universitas Padjadjaran, Jatinangor, West Java 45363, Indonesia; [euis.julaeha@unpad.ac.id](mailto:euis.julaeha@unpad.ac.id) (E.J.); [kristinshintadewi@gmail.com](mailto:kristinshintadewi@gmail.com) (K.S.D.); [tati.herlina@unpad.ac.id](mailto:tati.herlina@unpad.ac.id) (T.H.); [a.hardianto@unpad.ac.id](mailto:a.hardianto@unpad.ac.id) (A.H.)

<sup>2</sup> Department of Biology, Faculty of Mathematics and Natural Sciences, Universitas Padjadjaran, Jatinangor, West Java 45363, Indonesia; [m.nurzaman@unpad.ac.id](mailto:m.nurzaman@unpad.ac.id) (M.N.)

<sup>3</sup> Center for Textile, Jl. Jendral Ahmad Yani No. 390, Bandung, West Java 40272, Indonesia; [tatangwahyudi@kemenperin.go.id](mailto:tatangwahyudi@kemenperin.go.id) (T.W.)

\* Correspondence: [a.hardianto@unpad.ac.id](mailto:a.hardianto@unpad.ac.id)

---

|                   |                                                                                                                           |   |
|-------------------|---------------------------------------------------------------------------------------------------------------------------|---|
| <b>Figure S1.</b> | Chemical structures of secondary metabolites in essential oils (EOs) of five Indonesian-grown <i>Citrus</i> .....         | 2 |
| <b>Figure S2.</b> | Percentage of free-radical scavenging activities of ascorbic acid and five Indonesian-grown <i>Citrus</i> .....           | 3 |
| <b>Figure S3.</b> | Score plots on the coordinate systems of all PC combinations. (a) PC1 and PC2, (b) PC1 and PC3, and (c) PC1 and PC4. .... | 3 |
| <b>Table S1.</b>  | A matrix containing five rows of <i>Citrus</i> species and twenty-five columns of secondary metabolites.....              | 4 |
| <b>Table S2.</b>  | Representation quality of every descriptor on each PC. ....                                                               | 5 |
| <b>Table S3.</b>  | DPPH free radical scavenging activities and IC <sub>50</sub> of <i>Citrus</i> EOs. ....                                   | 6 |

### Monoterpenes

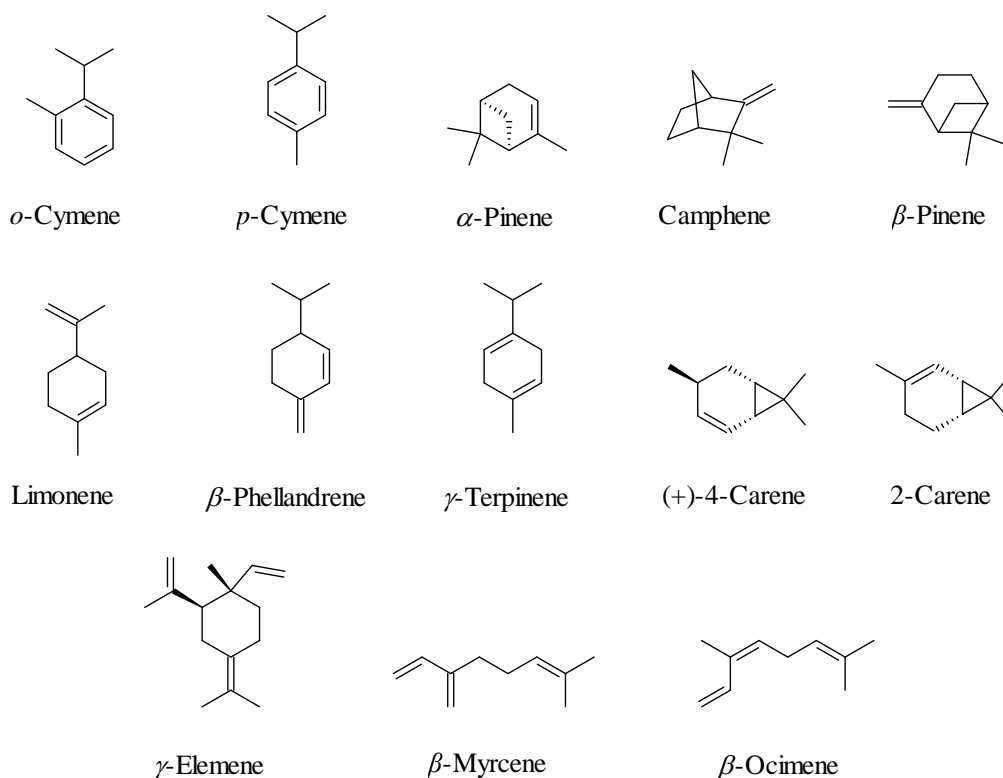

### Monoterpenoids

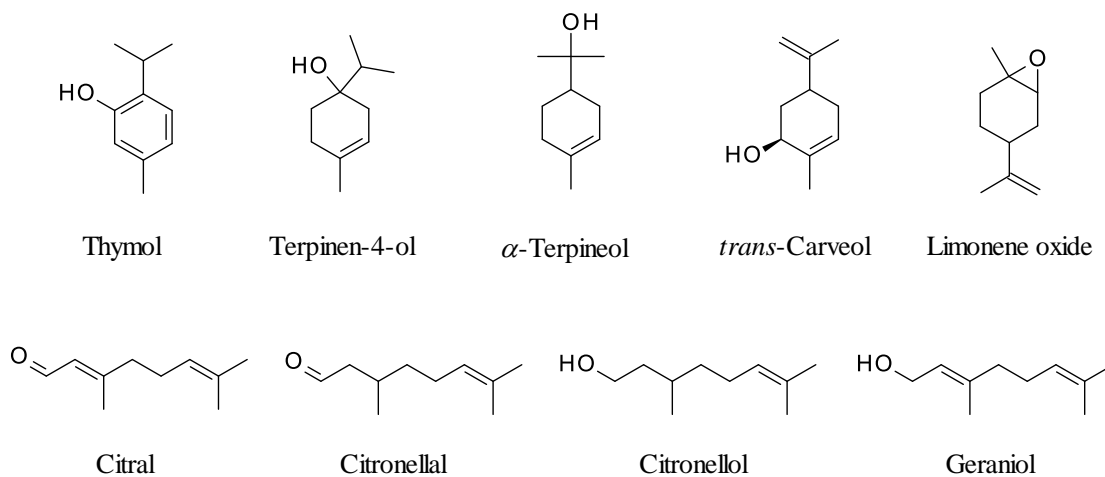

### Sesquiterpenes

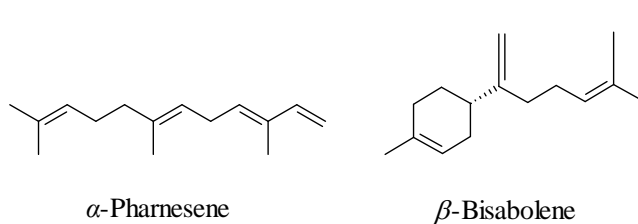

### Sesquiterpenoid

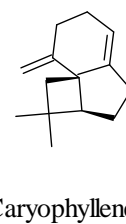

**Figure S1.** Chemical structures of secondary metabolites in essential oils (EOs) of five Indonesian-grown *Citrus*. These *Citrus* are *C. nobilis*, *C. limon*, *C. aurantifolia*, *C. amblycarpa*, and *Citrus spp.* Some secondary metabolites may be absent in a particular EO (see Table 2 in main text).

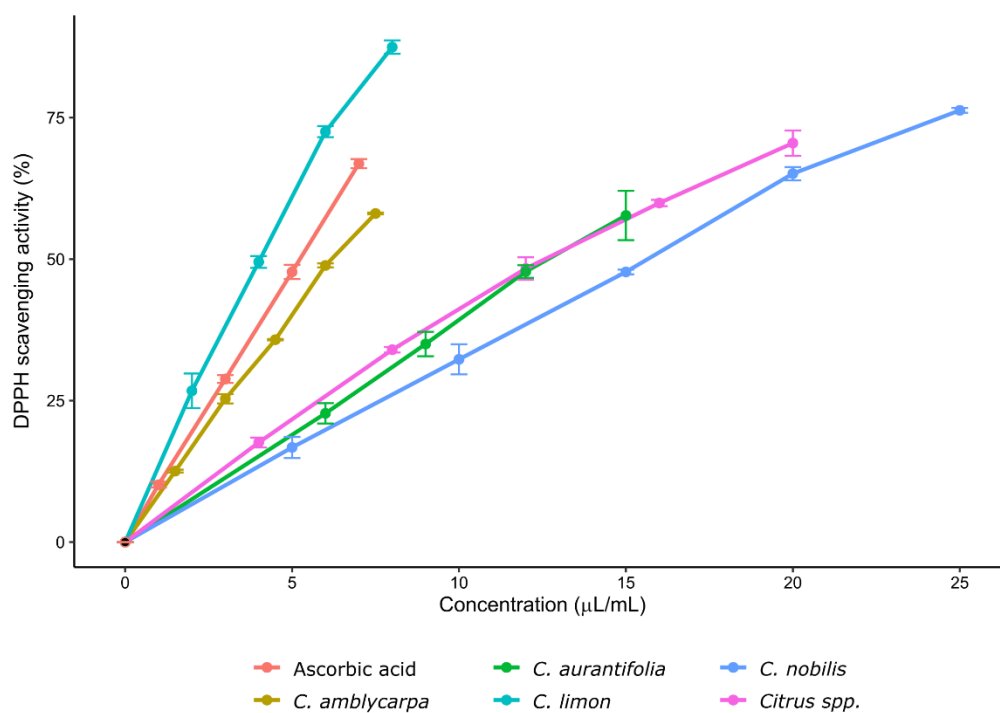

**Figure S2.** Percentage of free-radical scavenging activities of ascorbic acid and five Indonesian-grown *Citrus*.

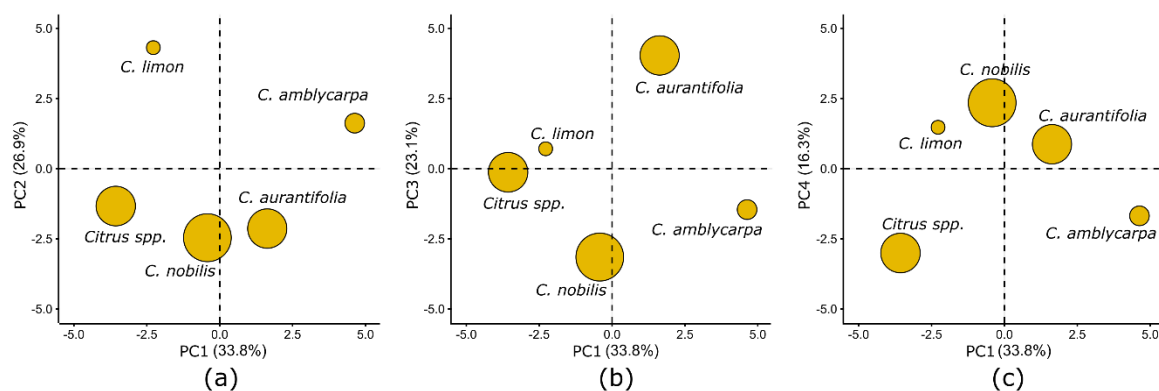

**Figure S3.** Score plots on the coordinate systems of all PC combinations. (a) PC1 and PC2, (b) PC1 and PC3, and (c) PC1 and PC4.

**Table S1.** A matrix containing five rows of *Citrus* species and twenty-five columns of secondary metabolites. The five *Citrus* species represent essential oils, whereas the secondary metabolites are descriptors. The values in the matrix are the percent area of secondary metabolites determined by GC-MS.

[illegible]

**Table S2.** Representation quality of every descriptor on each PC.

|                        | Representation quality (%) |     |     |     |
|------------------------|----------------------------|-----|-----|-----|
|                        | PC1                        | PC2 | PC3 | PC4 |
| <i>α</i> -Pinene       | 31                         | 10  | 58  | 1   |
| Camphene               | 88                         | 1   | 3   | 8   |
| <i>β</i> -Myrcene      | 6                          | 30  | 51  | 14  |
| <i>β</i> -Pinene       | 60                         | 0   | 40  | 0   |
| <i>D</i> -Limonene     | 78                         | 0   | 5   | 18  |
| <i>β</i> -Phellandrene | 77                         | 2   | 22  | 0   |
| <i>o</i> -Cymene       | 13                         | 63  | 8   | 17  |
| <i>β</i> -Ocimene      | 8                          | 73  | 9   | 10  |
| <i>γ</i> -Terpinene    | 2                          | 94  | 2   | 3   |
| (+)-4-Carene           | 8                          | 17  | 71  | 5   |
| Terpinen-4-ol          | 72                         | 10  | 9   | 9   |
| <i>α</i> -Terpineol    | 56                         | 8   | 2   | 34  |
| Citral                 | 34                         | 11  | 1   | 53  |
| 2-Carene               | 58                         | 33  | 2   | 8   |
| Caryophyllene          | 8                          | 17  | 71  | 5   |
| <i>γ</i> -Elemene      | 8                          | 17  | 71  | 5   |
| <i>β</i> -Bisabolene   | 88                         | 1   | 2   | 9   |
| Citronellal            | 1                          | 23  | 43  | 34  |
| Citronellol            | 65                         | 6   | 18  | 11  |
| <i>trans</i> -Carveol  | 1                          | 23  | 43  | 34  |
| Geraniol               | 1                          | 23  | 43  | 34  |
| Thymol                 | 15                         | 69  | 2   | 13  |
| <i>p</i> -Cymene       | 15                         | 69  | 2   | 13  |
| <i>α</i> -Pharnesene   | 15                         | 69  | 2   | 13  |
| Limonene oxide         | 38                         | 7   | 0   | 56  |

**Table S3.** DPPH free radical scavenging activities and IC<sub>50</sub> of *Citrus* EOs.

| Concentration ( $\mu\text{L/mL}$ ) | Absorbance |       | DPPH Scavenging Activity (%) |       | IC <sub>50</sub> ( $\mu\text{L/mL}$ ) |       |
|------------------------------------|------------|-------|------------------------------|-------|---------------------------------------|-------|
|                                    | I          | II    | I                            | II    | I                                     | II    |
| <b>Ascorbic Acid</b>               |            |       |                              |       |                                       |       |
| 0.0                                | 0.766      | 0.771 | 0.00                         | 0.00  |                                       |       |
| 1.0                                | 0.691      | 0.69  | 9.79                         | 10.38 |                                       |       |
| 3.0                                | 0.549      | 0.545 | 28.33                        | 28.79 | 5.29                                  | 5.26  |
| 5.0                                | 0.407      | 0.396 | 46.87                        | 47.21 |                                       |       |
| 7.0                                | 0.258      | 0.251 | 66.32                        | 66.54 |                                       |       |
| <b><i>C. limon</i></b>             |            |       |                              |       |                                       |       |
| 0.0                                | 0.838      | 0.855 | 0.00                         | 0.00  |                                       |       |
| 2.0                                | 0.632      | 0.608 | 24.58                        | 28.89 |                                       |       |
| 4.0                                | 0.417      | 0.438 | 50.24                        | 48.77 | 4.30                                  | 4.20  |
| 6.0                                | 0.236      | 0.229 | 71.84                        | 73.22 |                                       |       |
| 8.0                                | 0.112      | 0.100 | 86.63                        | 88.30 |                                       |       |
| <b><i>C. amblycarpa</i></b>        |            |       |                              |       |                                       |       |
| 0.0                                | 0.873      | 0.849 | 0.00                         | 0.00  |                                       |       |
| 1.5                                | 0.765      | 0.741 | 12.37                        | 12.72 |                                       |       |
| 3.0                                | 0.647      | 0.639 | 25.89                        | 24.73 |                                       |       |
| 4.5                                | 0.56       | 0.546 | 35.85                        | 35.69 | 6.27                                  | 6.33  |
| 6.0                                | 0.444      | 0.436 | 49.14                        | 48.65 |                                       |       |
| 7.5                                | 0.365      | 0.357 | 58.19                        | 57.95 |                                       |       |
| <b><i>C. aurantifolia</i></b>      |            |       |                              |       |                                       |       |
| 0.0                                | 0.928      | 0.908 | 0.00                         | 0.00  |                                       |       |
| 6.0                                | 0.705      | 0.713 | 24.03                        | 23.17 |                                       |       |
| 9.0                                | 0.589      | 0.604 | 36.53                        | 34.91 | 13.0                                  | 12.4  |
| 12.0                               | 0.477      | 0.481 | 48.60                        | 48.17 |                                       |       |
| 15.0                               | 0.421      | 0.356 | 54.63                        | 61.64 |                                       |       |
| <b><i>Citrus spp.</i></b>          |            |       |                              |       |                                       |       |
| 0.0                                | 0.835      | 0.824 | 0.00                         | 0.00  |                                       |       |
| 4.0                                | 0.683      | 0.684 | 18.20                        | 16.99 |                                       |       |
| 8.0                                | 0.554      | 0.541 | 33.65                        | 34.34 |                                       |       |
| 12.0                               | 0.443      | 0.414 | 46.95                        | 49.76 | 13.26                                 | 13.32 |
| 16.0                               | 0.338      | 0.327 | 59.52                        | 60.32 |                                       |       |
| 20.0                               | 0.233      | 0.256 | 72.10                        | 68.93 |                                       |       |
| <b><i>C. nobilis</i></b>           |            |       |                              |       |                                       |       |
| 0.0                                | 0.714      | 0.687 | 0.00                         | 0.00  |                                       |       |
| 5.0                                | 0.604      | 0.563 | 18.05                        | 18.05 |                                       |       |
| 10.0                               | 0.470      | 0.478 | 30.42                        | 30.42 |                                       |       |
| 15.0                               | 0.371      | 0.361 | 47.45                        | 47.45 | 15.80                                 | 15.85 |
| 20.0                               | 0.255      | 0.234 | 65.94                        | 65.94 |                                       |       |
| 25.0                               | 0.167      | 0.165 | 75.98                        | 75.98 |                                       |       |
